# Supplementary material
Source: ML conference proceedings conference paper supplement (https://openreview.net/forum?id=VJaoe7Rp9tZ)

# Tanh activation function

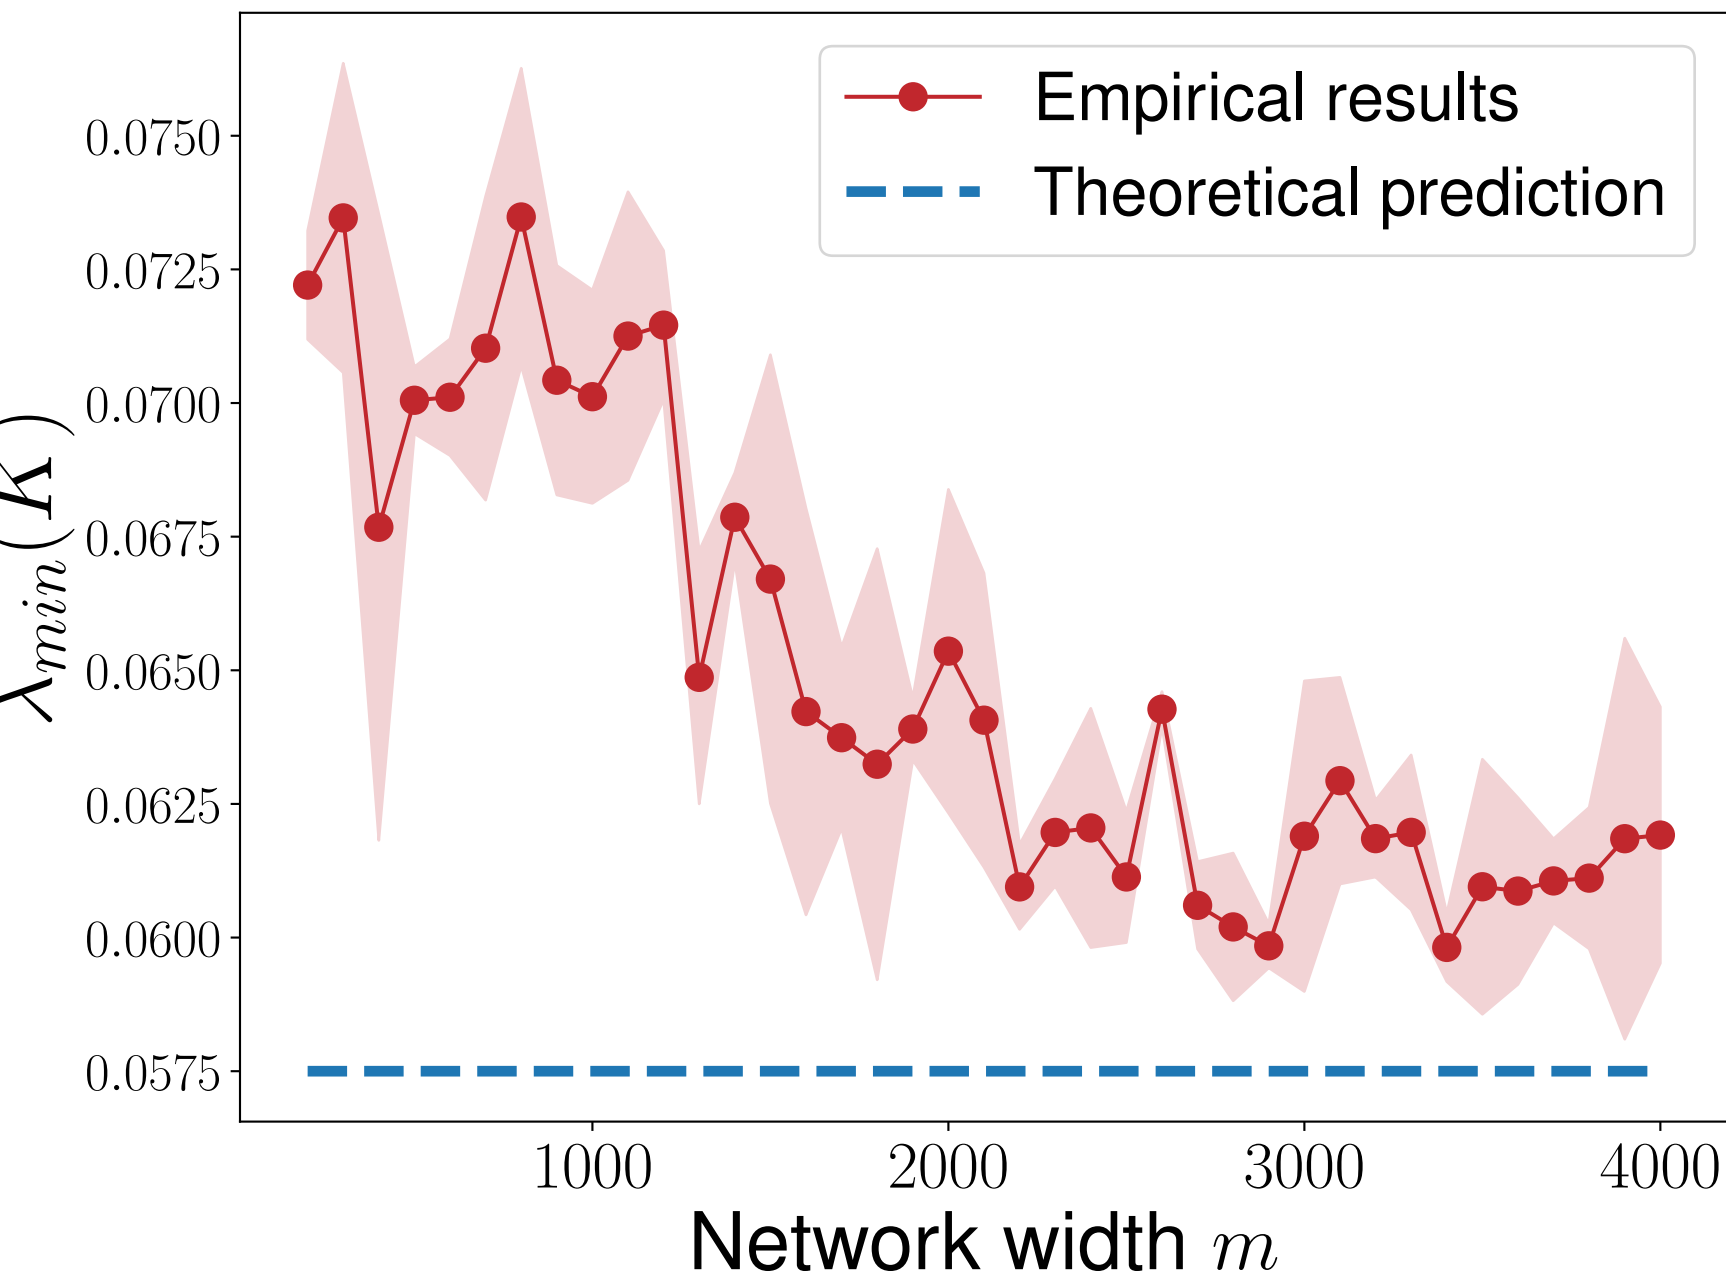

Supplement: supplementary_material [file attachment]

# Sigmoid activation function

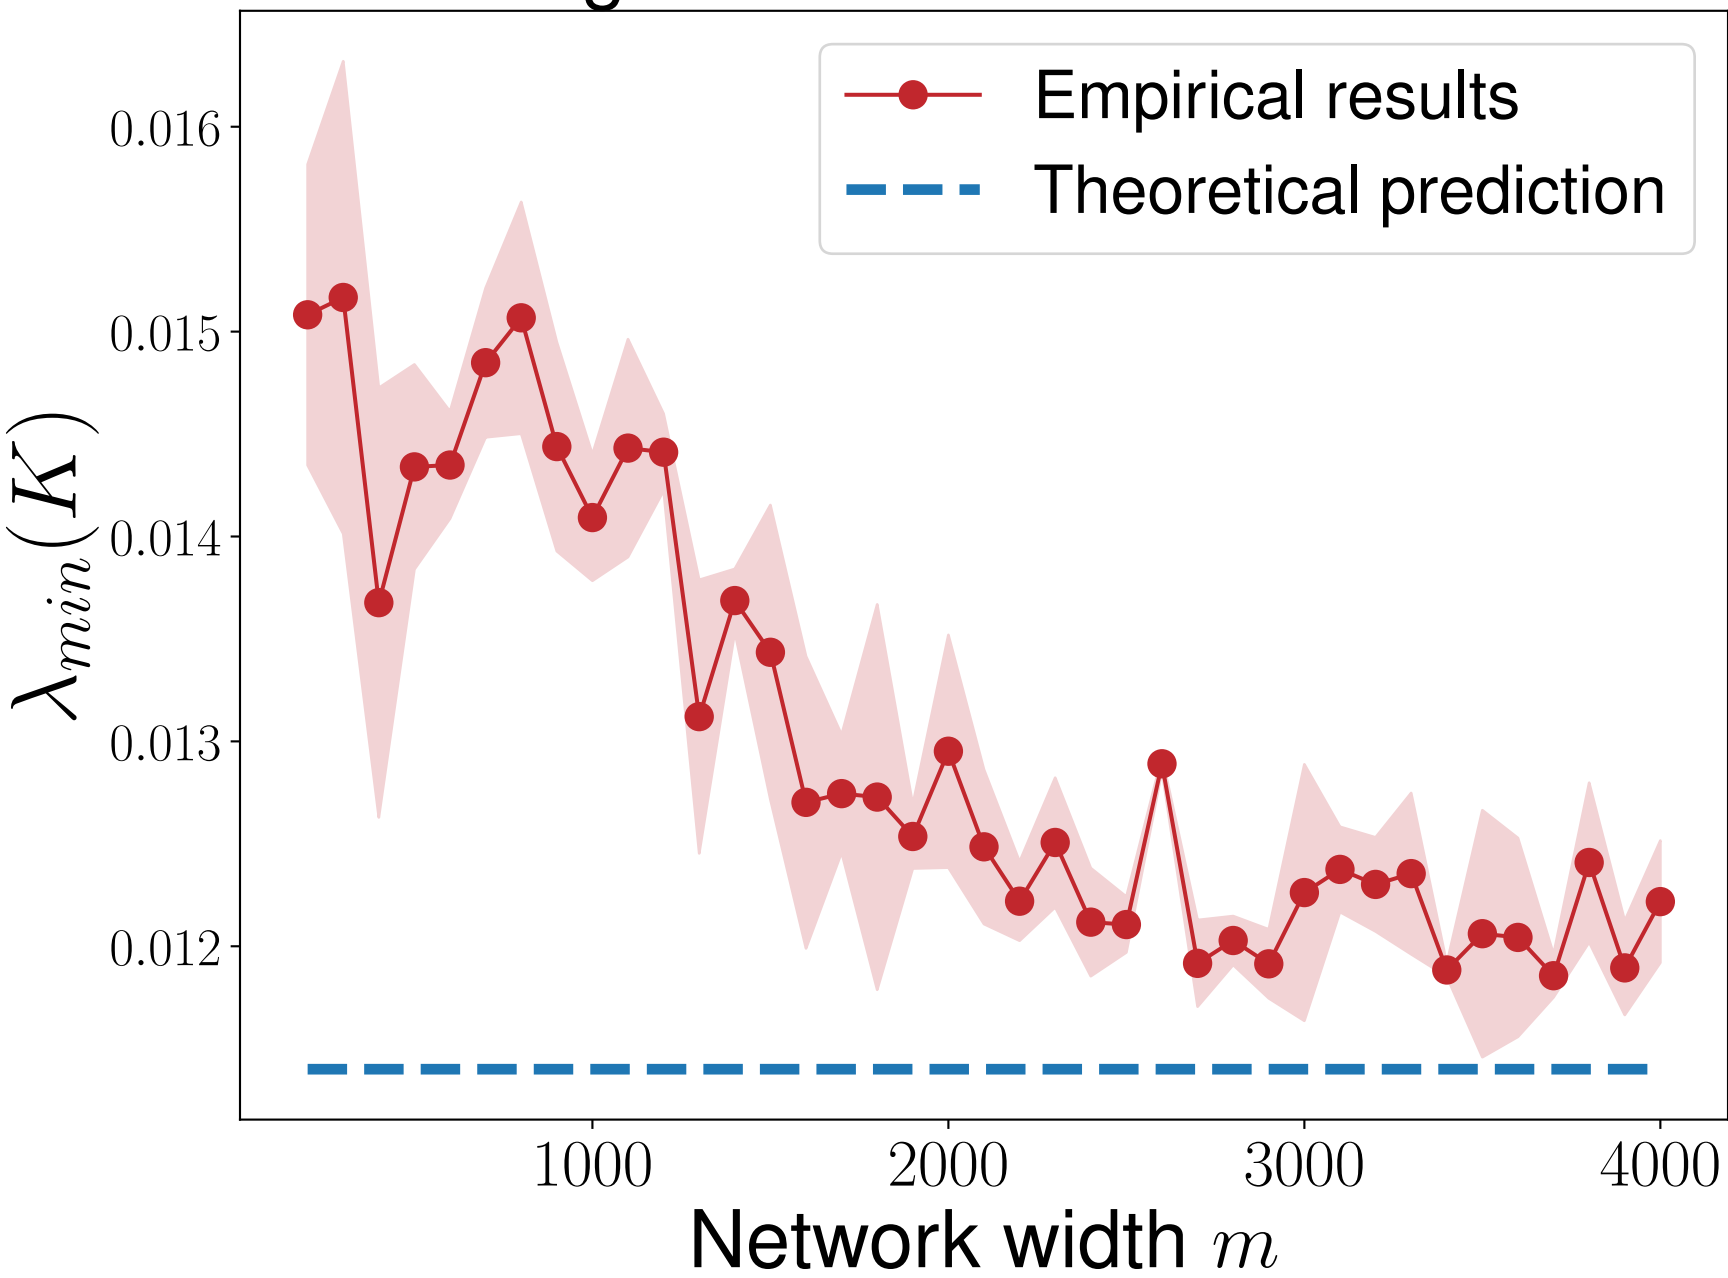

Supplement: supplementary_material [file attachment]
